# Supplementary material
Source: PubMed Central journal article supplement (PMC4581989)
Supplement: NIHMS717783-supplement-1.pdf [file NIHMS717783-supplement-1.pdf]

Figure 3. Distribution of mean deviation at annual visits for eyes with uveitis assigned to implant (grey) and systemic (white) therapy during the first 48 months of follow-up in the Multicenter Uveitis Steroid Treatment (MUST) Trial and Follow-up Study.

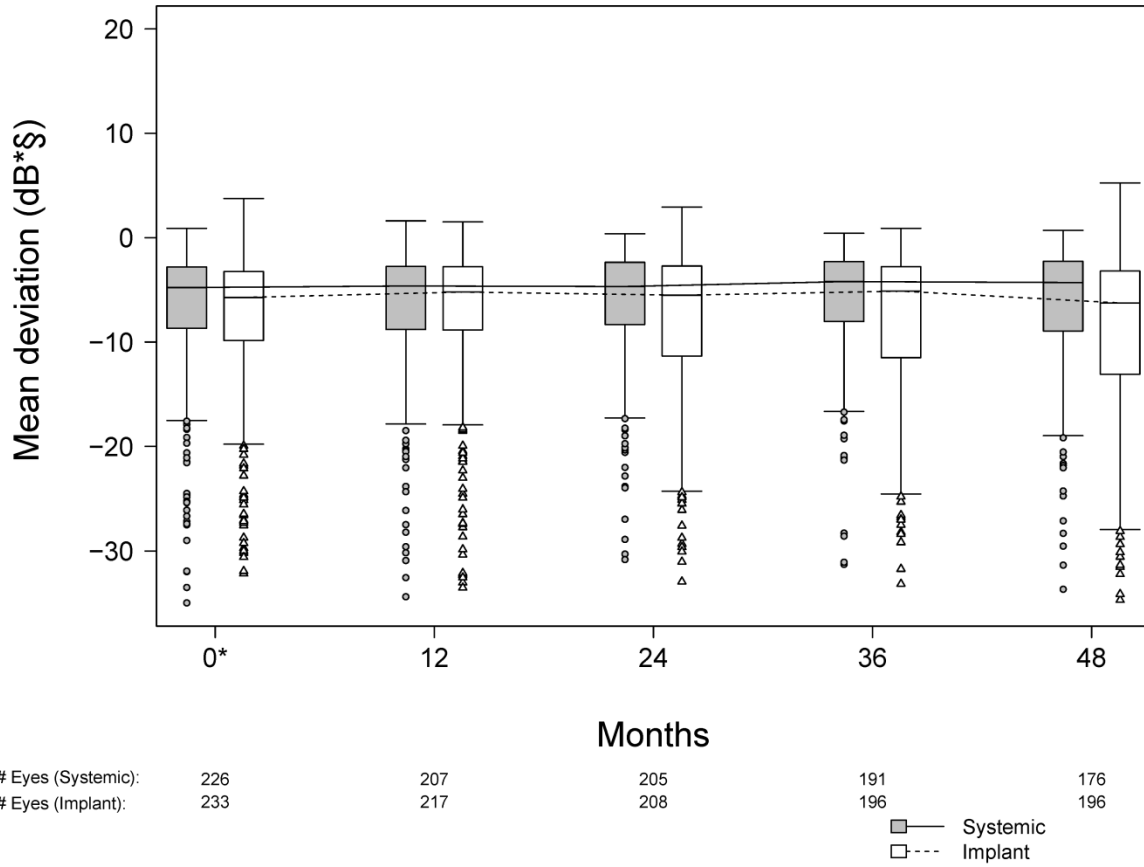

\* Calculated from the subset of eyes with uveitis at enrollment.  
 § Visual field automated perimetry: mean deviation
