# Supplementary material
Source: PubMed Central journal article supplement (PMC4581989)

Figure 5: Distribution of anterior chamber cell grades over time in (A) the fluocinolone acetonide (Implant Group) and (B) systemic therapy (Systemic Group) groups in the Multicenter Uveitis Steroid Treatment (MUST) Trial and Follow-up Study. N=number of eyes.

A.

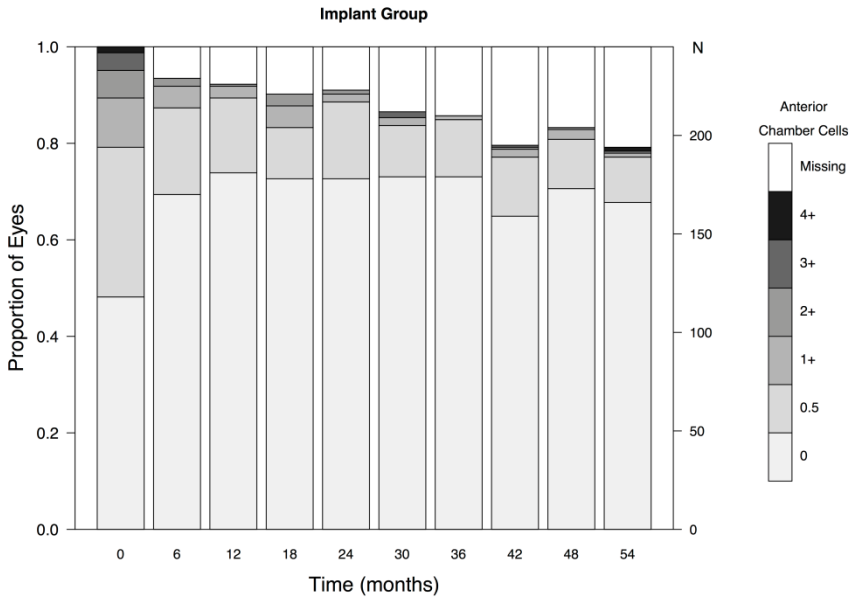

B.

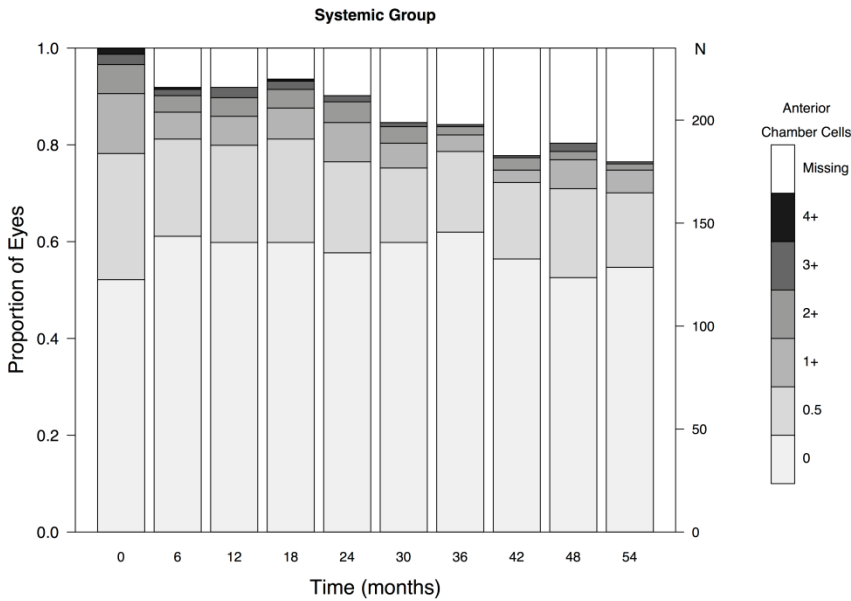

Supplement: NIHMS717783-supplement-2.pdf [file NIHMS717783-supplement-2.pdf]
