# Supplementary material
Source: PubMed Central journal article supplement (PMC4581989)
Supplement: NIHMS717783-supplement-4.pdf [file NIHMS717783-supplement-4.pdf]

Figure 8. Proportion of uveitic eyes with macular edema for those assigned to implant (dotted line) and systemic (solid line) therapy during the first 48 months of follow-up in the Multicenter Uveitis Steroid Treatment (MUST) Trial and Follow-up Study.

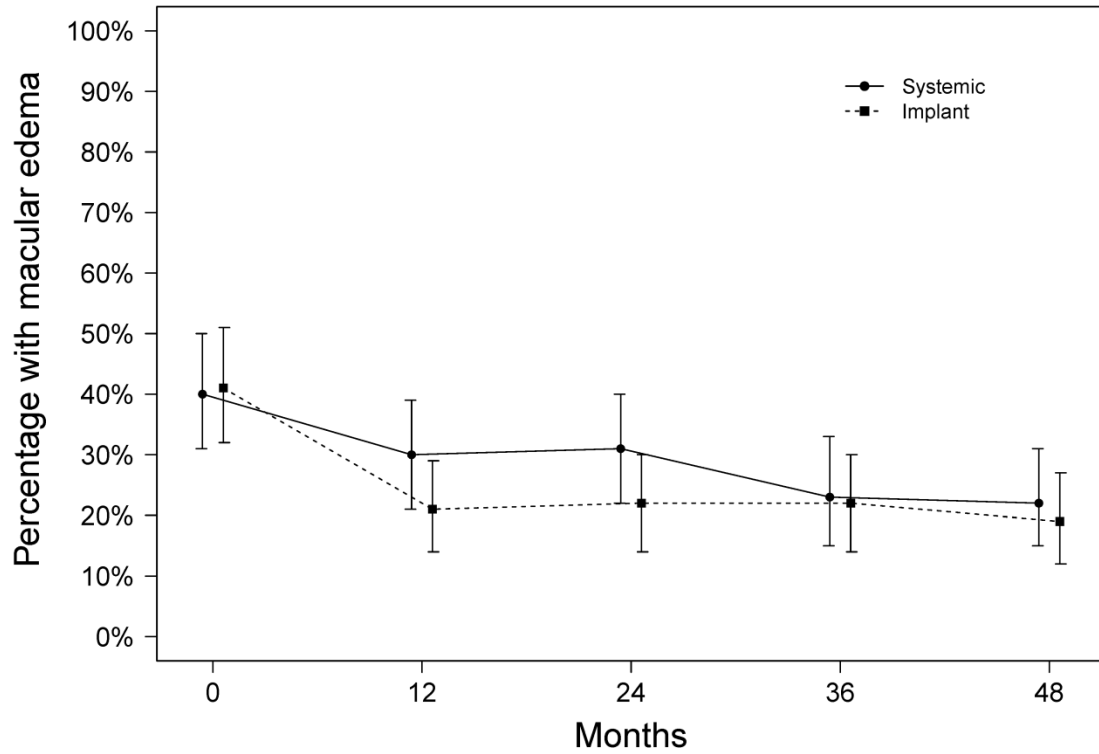

|                            |     |     |     |     |     |
|----------------------------|-----|-----|-----|-----|-----|
| # Eyes at risk (Systemic): | 216 | 182 | 197 | 174 | 171 |
| # Eyes at risk (Implant):  | 220 | 203 | 206 | 183 | 170 |
